# Supplementary material for: Outcomes of Patients Treated With Antibiotic-Loaded Acryl Bone Cement For Periprosthetic Hip Infection, Stratified By Cement Polymerization Temperature: A Retrospective Study
Source: Research Square preprint supplement (doi:10.21203/rs.3.rs-1001766/v1), 2021-10-27
Supplement: Supplementary file 2 [file a7979953b2556aa6746ebafe.xlsx]

## Sheet: Data English
Case	Age	Sex	Previous surgery	Time to onset of infection (Month)	ASA（class）	Causative bacteria	Fistule	Period until infection subsiding (Week)	Number of beads or spacers with ALAC surgeries	Results of revision surgery	Bone cement used for ALAC	Antibacterial agents contained in ALAC
1	57	F	BHA	18	3	MSSE	+	30	3	Success	SimplexP	CTRX
2	70	M	BHA	21	2	MSSE	-	30	3	Success	SimplexP	ABPC、MINO
3	60	F	THA	9	3	E.faecalis	-	13	2	Girdle stone	SimplexP	ABPC、IPM
4	66	F	THA	5	3	E.coli	+	21	2	Success	SimplexP	IPM
5	80	F	revisionTHA	62	2	MRSA	-	34	3	Success	Zimmer bone cement	VCM、GM
6	86	F	BHA	3	2	Enterobactor cloacae	-	21	1	Success	Zimmer bone cement	PAPM
7	77	M	THA	77	3	MRSA	＋	28	2	Recurrence	Zimmer bone cement	VCM
8	68	M	THA	86	1	MSSE	-	28	2	Success	Zimmer bone cement	VCM、CTX
9	80	F	THA	91	2	MSSE	-	25	4	Girdle stone	Zimmer bone cement	MINO
10	81	F	THA	0.25	1	MRSA	＋	35	4	Recurrence	Zimmer bone cement	VCM GM
11	82	M	BHA	0.25	1	MRSA	-	26	3	Success	Zimmer bone cement	VCM
12	76	F	THA	1.5	1	MSSA	＋	21	1	Success	Zimmer bone cement	VCM
13	80	F	THA	77	1	MRSA	＋	15	1	Success	Cemex	VCM
14	81	F	THA	117	2	parvimonas micra	-	8	1	Success	Cemex	VCM CEZ
15	57	F	THA	65	1	MSSE	-	8	1	Success	Cemex	VCM MINO
16	75	F	revisionTHA	54	1	MSSA	-	12	1	Success	Cemex	VCM MINO
17	80	F	BHA	5	1	MSSE	-	7	1	Success	Cemex	VCM
18	61	M	THA	75	1	parvimonas micra	-	8	1	Success	Cemex	VCM
19	73	F	BHA	264	2	unclear	＋	8	1	Success	Cemex	VCM CTX
20	73	M	BHA	60	1	Staphyrococcus capitis	-	8	1	Success	Cemex	VCM MINO
21	57	F	THA	57	3	Staphyrococcus pasteuri	-	7	1	Success	Cemex	VCM AMK
22	62	F	revisionTHA	35	2	MRSA	＋	8	1	Success	Cemex	VCM
23	84	F	BHA	15	2	Staphyrococcus caprae	-	8	1	Success	Cemex	VCM AMK
